# Supplementary material for: Tracing cellular heterogeneity in pooled genetic screens via multi-level barcoding
Source: PubMed Central journal article supplement (PMC6364396; doi:10.1186/s12864-019-5480-0), 2019-02-06

Column:

I

II

III

**TRAIL Ab**

0 ng/ml

8 ng/ml

16 ng/ml

31 ng/ml

62 ng/ml

125 ng/ml

250 ng/ml

500 ng/ml

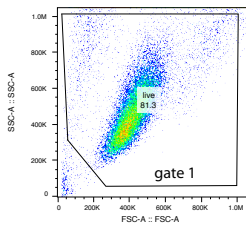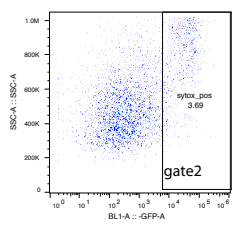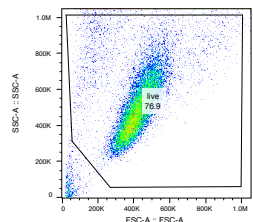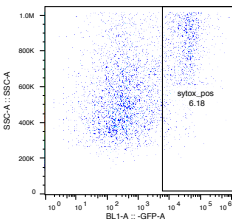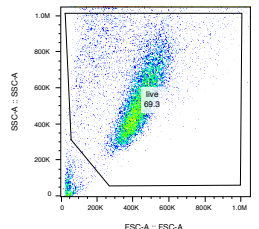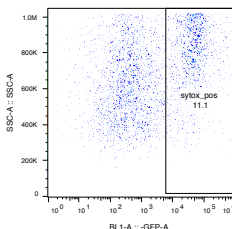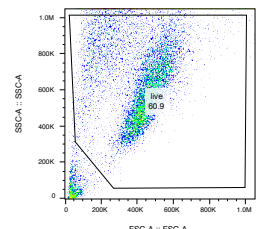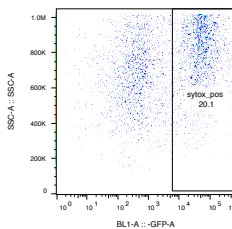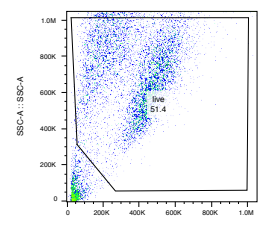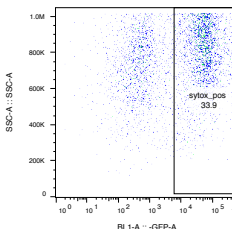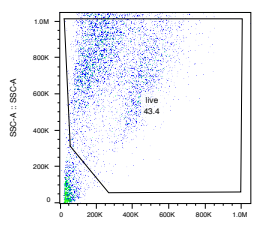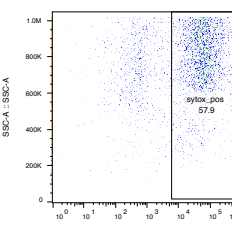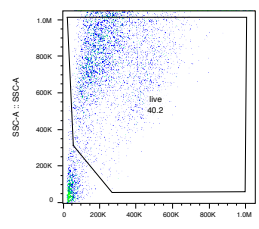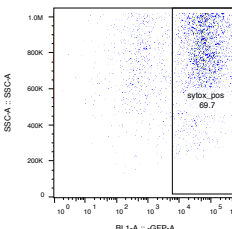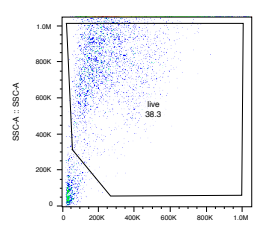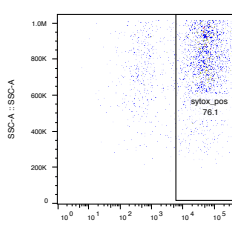

Supplement: 12864_2019_5480_MOESM1_ESM.pdf [file 12864_2019_5480_MOESM1_ESM.pdf]
