# Supplementary material for: Tracing cellular heterogeneity in pooled genetic screens via multi-level barcoding
Source: PubMed Central journal article supplement (PMC6364396; doi:10.1186/s12864-019-5480-0), 2019-02-06
Supplement: 12864_2019_5480_MOESM8_ESM.pdf [file 12864_2019_5480_MOESM8_ESM.pdf]

# CRISPRwt

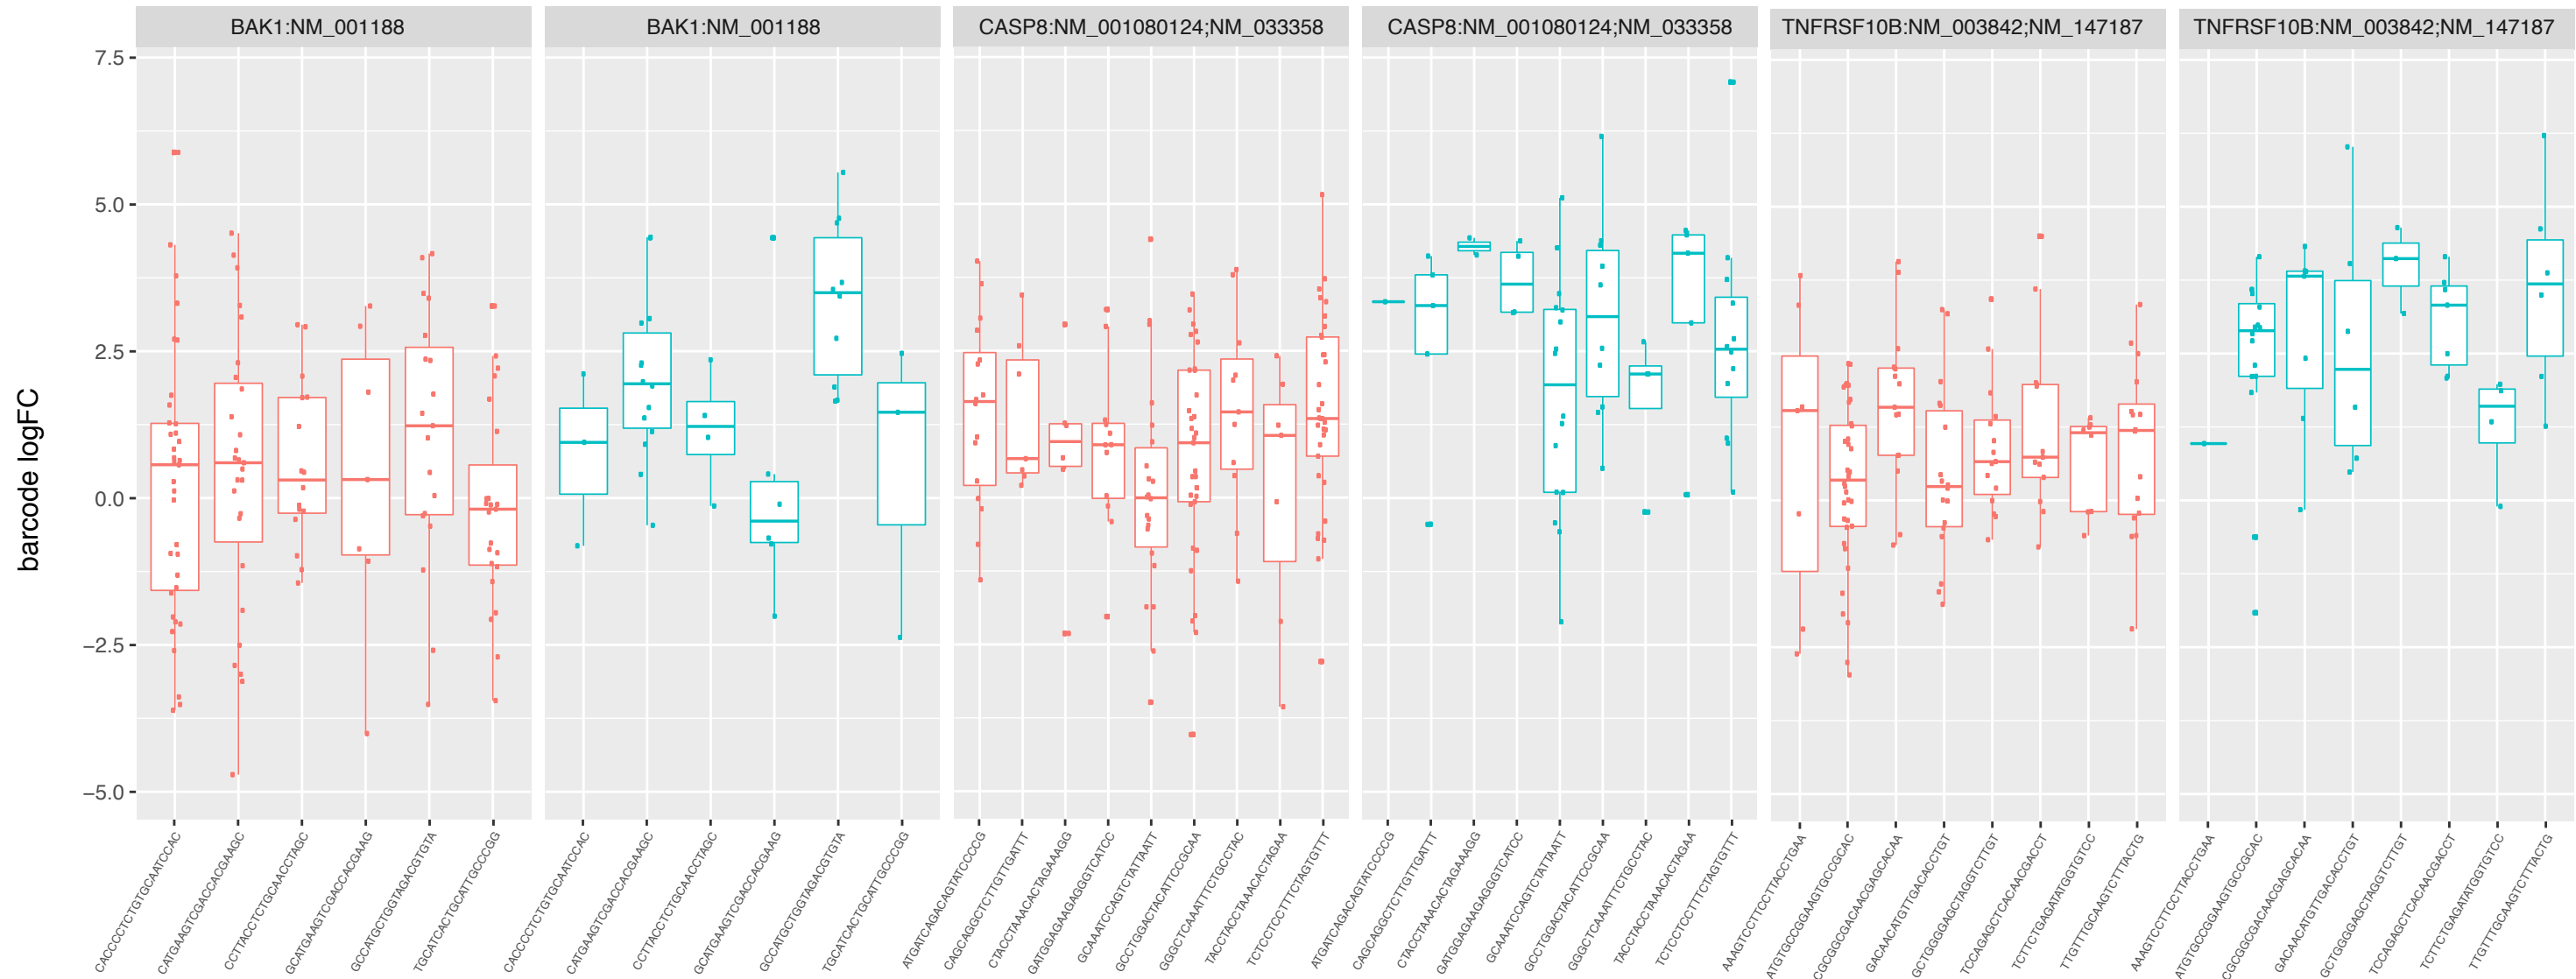

# CRISPRi

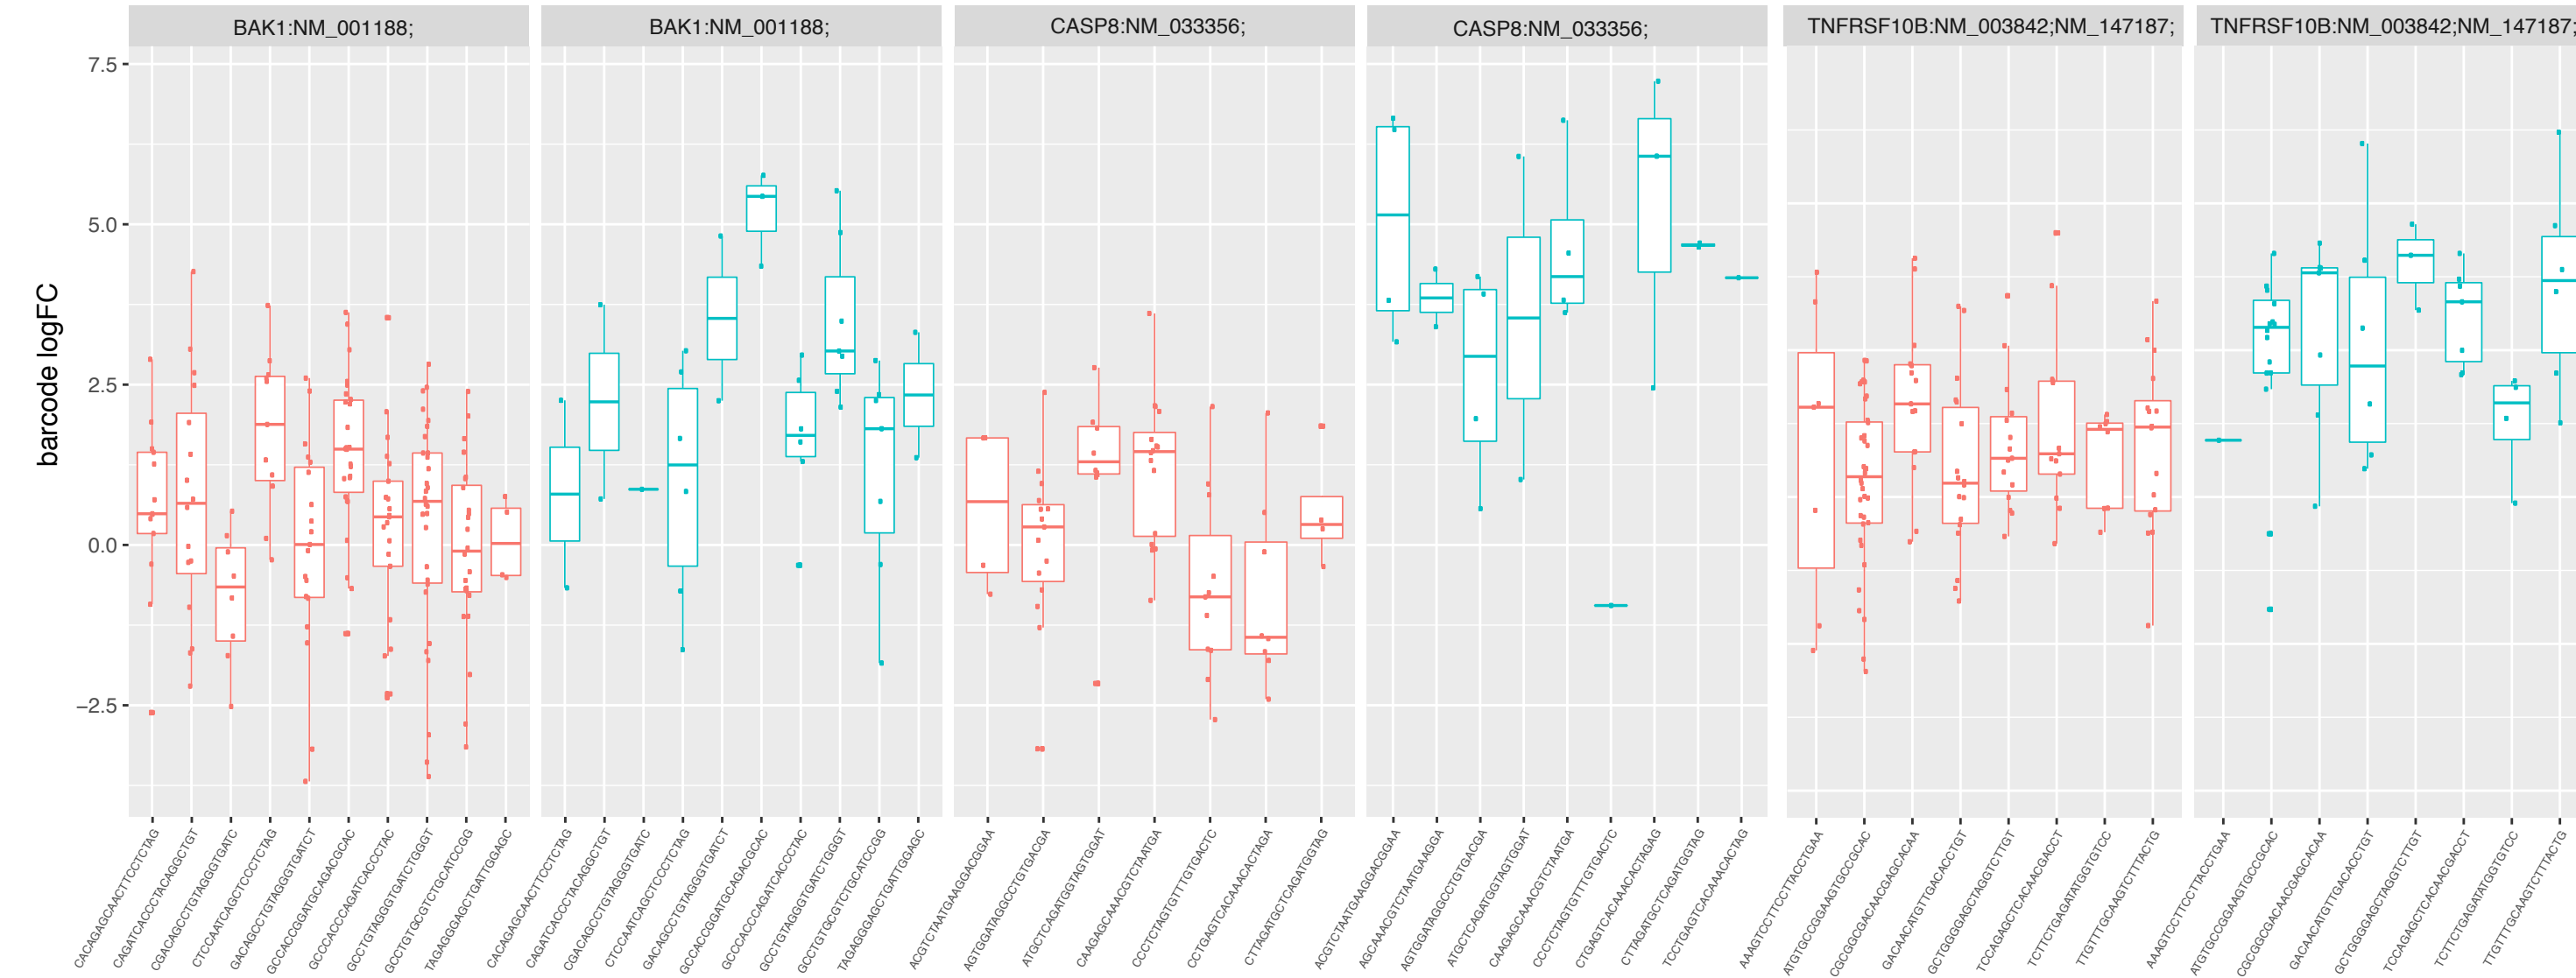

sgRNA
